# Supplementary material for: Fluorescence-guided Surgery of Osteoradionecrosis of the Jaw: A Retrospective Study
Source: Research Square preprint supplement (doi:10.21203/rs.3.rs-832409/v1), 2021-08-30
Supplement: Supplementary file 1 [file 39dd64b63c583c0bc8d29b97.docx]

23.8.2021

Dear Sir/Madam,

Thank you very much for your email.

I added the requested sections in the manuscript. Also I modified the abstract as requested.

For the author (Aristeides Chronopoulos), the spelling of his name was corrected in the submission system and to be (Aristeidis Chronopoulos). His name is not missing but the spelling was not correct and has been corrected.

For your second question: “We notice that there are discrepancies in the author names given in the manuscript and the author names in submission system (Sven Otto, Sven Otto). Could you please verify which is/are correct?”

I cannot find any discrepancy and the author name is Sven Otto.

For the third question, I verify that my emails are: ([sraljohani@kau.edu.sa)](mailto:sraljohani@kau.edu.sa)) and (suadaljohani@yahoo.com).


Thank you again.

Sincerely,

Suad Aljohani

* Address for correspondence/reprints:

Suad Aljohani

Department of Oral Diagnostic Sciences

Faculty of Dentistry

King Abdulaziz University

Jeddah, Saudi Arabia

[sraljohani@kau.edu.sa](mailto:sraljohani@kau.edu.sa)

Phone: +966 504684942

ORCID iD: https://orcid.org/0000-0002-4169-6046
